# Supplementary material for: High-efficiency counter electrodes for quantum dot–sensitized solar cells (QDSSCs): designing graphene-supported CuCo2O4 porous hollow microspheres with improved electron transport performance
Source: Royal Society of Chemistry journal article supplement (doi:10.1039/d2dt00106c), 2022-01-01
Supplement: d2dt00106c1.pdf [file d2dt00106c1.pdf]

## Supporting Information

### **High-efficiency counter electrodes for quantum dot-sensitized solar cells (QDSSCs): Designing Graphene-supported $\text{CuCo}_2\text{O}_4$ porous hollow microspheres with improved electron transport performance**

Qiu Zhang, Tingting Zhang, Libo Wang, Fengyan Li \*, Lin Xu \*

*Key Laboratory of Polyoxometalate and Reticular Material Chemistry of Ministry of Education, Department of Chemistry, Northeast Normal University, Changchun, Jilin 130024, P. R. China.*

*E-mail: lify525@nenu.edu.cn; linxu@nenu.edu.cn*

## 1. Experimental section

### 1.1. Chemicals and materials

$\text{Cu}(\text{NO}_3)_2 \cdot 3\text{H}_2\text{O}$  (AR,  $\geq 99.5\%$ ),  $(\text{NH}_2)_2\text{CO}$  (AR,  $\geq 99.0\%$ ), Terpineol ( $\text{C}_{10}\text{H}_{18}\text{O}$ , AR),  $\text{NH}_4\text{Cl}$  (AR,  $\geq 99.0\%$ ),  $\text{H}_2\text{NCSNH}_2$  (AR,  $\geq 99.0\%$ ),  $\text{C}_4\text{H}_6\text{O}_4\text{Zn} \cdot 2\text{H}_2\text{O}$  (AR,  $\geq 99.0\%$ ),  $\text{KCl}$  (AR,  $\geq 99.5\%$ ),  $\text{Na}_2\text{SO}_3$  (AR,  $\geq 97.0\%$ ), ammonium hydroxide, isopropanol, glycerol, absolute methanol and acetone were purchased from Sinopharm.  $\text{Na}_2\text{S} \cdot 9\text{H}_2\text{O}$  (AR,  $\geq 98.0\%$ ),  $\text{Co}(\text{NO}_3)_2 \cdot 6\text{H}_2\text{O}$  (AR,  $\geq 99\%$ ), polyvinylpyrrolidone (K30), Sulfur (S, 99.99%), Graphite powder (99.8%), Titanium oxide ( $\text{TiO}_2$ , Degussa, P25).  $\text{CdCl}_2$  (AR,  $\geq 99.0\%$ ),  $\text{Cd}(\text{OAc})_2$  (AR, 99.0%),  $\text{N}(\text{CH}_2\text{COONa})_3$  (AR, 98.0%), selenium powder (Se, 200 mesh, 99.9%) were purchased from Aladdin (Sigma-Aldrich).

### 1.2. Characterizations

X-ray powder diffraction test was conducted from  $15$  to  $80^\circ$  adopting Siemens D5005 diffractometer with Cu target  $\text{K}\alpha$  ( $\lambda = 1.5418 \text{ \AA}$ ) rays as X-ray source. A field emission scanning electron microscope (SEM JEOL JSM 4800F) equipped with X-ray energy dispersion (EDX) analysis was used to study the surface morphology and element composition of the samples. X-ray photoelectron spectroscopy (XPS) was carried out applying an ESCALABMKII spectrometer and the X-ray source was achromatic Al-K $\alpha$  (1486.6 eV). The electron transmission microscopy (TEM) and HRTEM images was received using the transmission electron microscope JEOL-2100F. The datas of nitrogen adsorption–desorption isotherms were collected from an ASAP 2020 (Micromeritics, USA). An IVIUM purchased from Tianjin Brillante Technology Limited with a filtered 500 W Xenon lamp is utilized to current–voltage (I–V) curves measurements under the condition of AM 1.5  $100 \text{ mW/cm}^2$ . Incident photon-to-current efficiency (IPCE) was received by BUNKOKEIKI CEP-2000. The EIS, Tafel, CV and open circuit voltage decay (OCVD) tests are all used CHI660D electrochemical workstation (Shanghai Chenhua, China). EIS test conditions: the frequency range is  $10^{-1}$ – $10^5$  Hz; the amplitude is 0.01 V, which is performed under the condition of open-circuit voltage. All characterizations were conducted at ambient temperature and pressure.

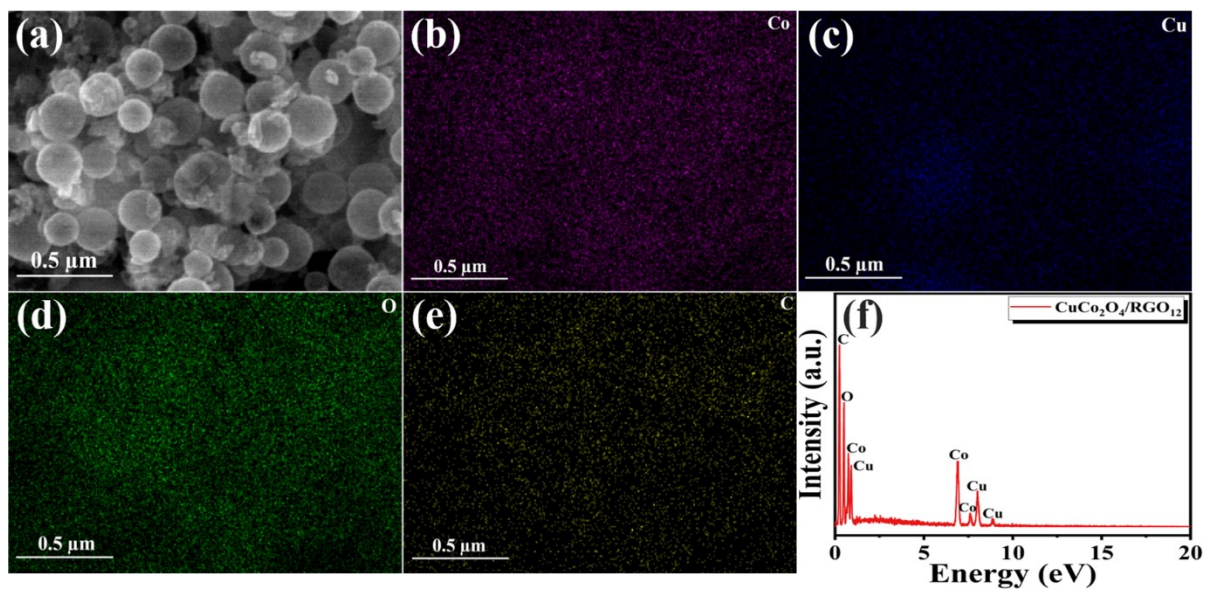

**Fig. S1.** (a–e) EDX elemental mappings of Co (b), Cu (c), O (d), C (e) and (f) EDX image in the  $\text{CuCo}_2\text{O}_4/\text{RGO}_{12}$  composite.

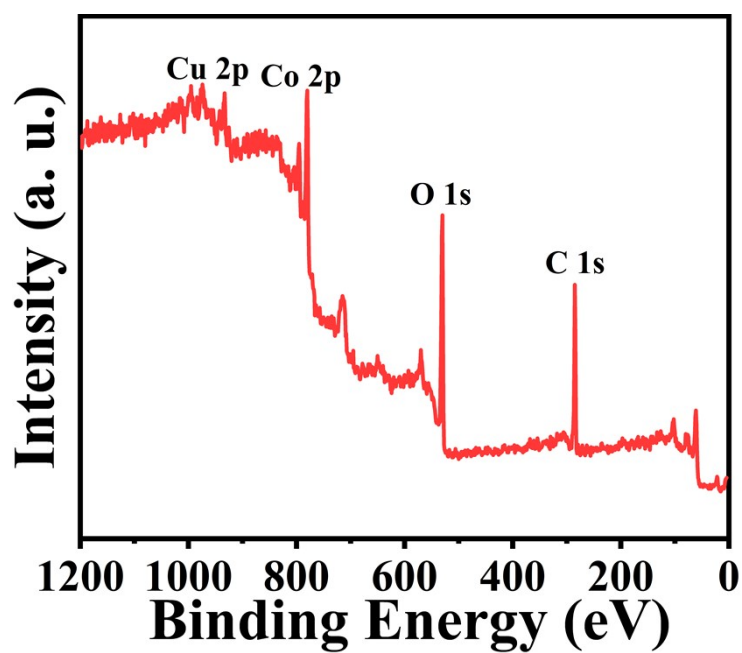

**Fig. S2.** XPS survey scan spectrum of  $\text{CuCo}_2\text{O}_4/\text{RGO}_{12}$  composite.

**Table S1** Comparison of QDSSCs performance with other reported counter electrodes.

| Counter electrode                                     | $J_{sc}$<br>( $\text{mA}/\text{cm}^2$ ) | $V_{oc}$<br>(V) | FF    | PCE<br>(%) | Ref.      |
|-------------------------------------------------------|-----------------------------------------|-----------------|-------|------------|-----------|
| <b>Cu<sub>1.18</sub>S-GOR</b>                         | 20.55                                   | 0.626           | 0.53  | 6.81       | 1         |
| <b>BCNT</b>                                           | 17.40                                   | 0.520           | 0.52  | 4.55       | 2         |
| <b>CoSe<sub>2</sub>-NC</b>                            | 19.65                                   | 0.540           | 0.48  | 5.06       | 3         |
| <b>g-C<sub>3</sub>N<sub>4</sub>/NiS</b>               | 17.56                                   | 0.570           | 0.56  | 5.64       | 4         |
| <b>Cu<sub>2</sub>S@SLG</b>                            | 3.74                                    | 0.500           | 0.63  | 3.93       | 5         |
| <b>MnCo<sub>2</sub>S<sub>4</sub>/CNTs</b>             | 18.45                                   | 0.580           | 0.45  | 4.85       | 6         |
| <b>MoS<sub>2</sub>/CNT</b>                            | 20.16                                   | 0.620           | 0.40  | 5.05       | 7         |
| <b>Ti/Cu<sub>2</sub>S</b>                             | 16.31                                   | 0.570           | 0.44  | 4.11       | 8         |
| <b>alpha-MoO<sub>3</sub>-C</b>                        | 1.29                                    | 0.48            | 0.31  | 1.29       | 9         |
| <b>Cu<sub>2-x</sub>Se/Cu<sub>7</sub>S<sub>4</sub></b> | 23.02                                   | 0.517           | 0.36  | 4.38       | 10        |
| <b>CB/Cu<sub>x</sub>S</b>                             | 16.96                                   | 0.584           | 0.567 | 5.62       | 11        |
| <b>RGO-Cu<sub>2</sub>S</b>                            | 15.85                                   | 0.556           | 0.44  | 3.85       | 12        |
| <b>Cu<sub>2</sub>ZnSnS<sub>4</sub></b>                | 13.40                                   | 0.730           | 0.67  | 6.19       | 13        |
| <b>Flower-like CuCo<sub>2</sub>O<sub>4</sub>@RGO</b>  | 12.11                                   | 0.79            | 0.64  | 6.11       | 14        |
| <b>NiS-rGO</b>                                        | 5.55                                    | 0.80            | 0.32  | 1.42       | 15        |
| <b>RGO/SnO<sub>2</sub>/PANI</b>                       | 18.60                                   | 0.708           | 0.63  | 7.92       | 16        |
| <b>CuCo<sub>2</sub>O<sub>4</sub></b>                  | 21.83                                   | 0.60            | 0.47  | 6.19       | This work |
| <b>CuCo<sub>2</sub>O<sub>4</sub>/RGO<sub>12</sub></b> | 22.83                                   | 0.61            | 0.51  | 7.04       | This work |

## References

- 1 D. Ghosh, G. Halder, A. Sahasrabudhe and S. Bhattacharyya, *Nanoscale*, 2016, **8**, 10632.
- 2 W. Li, S. Zhang, Q. Chen and Q. Zhong, *Catal. Sci. Technol.*, 2021, **11**, 2745-2752.
- 3 W. Li, M. Zheng, Z. Tian, G. Long, S. Zhang, Q. Chen and Q. Zhong, *ECS J. Solid State Sci. Technol.*, 2021, **10**, 045012.
- 4 W. Li, Q. Chen and Q. Zhong, *J. Mater. Sci.*, 2020, **55**, 10712-10724.
- 5 E. Akman, Y. Altintas, M. Gulen, M. Yilmaz, E. Mutlugun and S. Sonmezoglu, *Renew. Energ.*, 2020, **145**, 2192-2200.
- 6 W. Li, L. He, J. Zhang, B. Li, Q. Chen and Q. Zhong, *J. Phys. Chem. C*, 2019, **123**, 21866-21873.
- 7 H. Yan, Z. Qi, Q. Chen and Q. Zhong, *ECS J. Solid State Sci. Technol.*, 2019, **8**, P77-P82.
- 8 J. Chae, M. Oh, V. H. V. Quy, J. Kwon, J.-H. Kim, S.-H. Kang, H. Kim, E. Vijayakumar and K.-S. Ahn, *Thin Solid Films*, 2018, **660**, 46-53.
- 9 P. S. Tamboli, M. B. R. Prasad, V. S. Kadam, R. S. Vhatkar, Inamuddin; H. M. Pathan and S. S. Mahajan, *Sol. Energy Mater. Sol. Cells*, 2017, **161**, 96-101.
- 10 L. Ran and L. Yin, *CrystEngComm*, 2017, **19**, 5640-5652.
- 11 I. P. Liu, H. Teng and Y.-L. Lee, *J. Mater. Chem. A*, 2017, **5**, 23146-23157.
- 12 M. Ye, C. Chen, N. Zhang, X. Wen, W. Guo and C. Lin, *Adv. Energy Mater.*, 2014, **4**, 1301564.
- 13 Y. Li, M. Yang, Y. Huang, X. Sun, K. Liu and J. Zhang, *Solid State Sci.*, 2021, **113**, 106547.
- 14 K. Xiong, W. Nie, P. Yu, L. Zhu and X. Xiao, *Mater. Lett.*, 2017, **204**, 69-72.
- 15 S. A. Salleh, M. Y. A. Rahman and T. H. T. Aziz, *Inorg. Chem. Commun.*, 2022, **135**, 109086.
- 16 M. A. K. L. Dissanayake, J. M. K. W. Kumari, G. K. R. Senadeera and H. Anwar, *Sol. Energy*, 2021, **230**, 151-165.
